# Supplementary material
Source: MDPI journal article supplement (https://www.mdpi.com/2077-0472/13/3/563)
Supplement: s1 [file s1]

Archive with 2 entries (2 files):
- Supplementary Figure S1-FigureS4.pdf
- Supplementary Table S1-Table S5.pdf
