# Supplementary material
Source: MDPI journal article supplement (https://www.mdpi.com/2077-0472/13/3/563)
Supplement: s1 [file s1 › Supplementary Table S1-Table S5.pdf]

## Supplementary Tables

**Supplementary Table S1. Comparison of agronomic traits between wild type WYJ7 and mutant *tscd5* (mean  $\pm$  SD, n = 9).**

| Agronomic Characters            | Wild type        | Mutant             |
|---------------------------------|------------------|--------------------|
| Plant height/cm                 | 92.17 $\pm$ 1.87 | 85.11 $\pm$ 3.41** |
| Tillering number                | 10 $\pm$ 1.09    | 9 $\pm$ 1.83       |
| Panicle length/cm               | 18.14 $\pm$ 0.81 | 17.38 $\pm$ 0.56*  |
| No.of primary rachis branches   | 14.44 $\pm$ 0.88 | 14.22 $\pm$ 0.83   |
| No.of secondary rachis branches | 35.89 $\pm$ 1.76 | 33 $\pm$ 2.96*     |
| Grain length/cm                 | 7.13 $\pm$ 0.3   | 7.04 $\pm$ 0.31    |
| Grain width/mm                  | 3.3 $\pm$ 0.15   | 3.11 $\pm$ 0.23*   |
| 1000-grain weight/g             | 30.81 $\pm$ 0.1  | 27.94 $\pm$ 0.07** |
| Seed setting rate/%             | 92.41 $\pm$ 2.46 | 85.52 $\pm$ 4.47** |

\* Significance at  $P < 0.05$ , \*\* extremely significance at  $P < 0.01$ .

**Supplementary Table S2. Genetic analysis of the *tscd5* mutant in F<sub>2</sub> population.**

| Cross               | F <sub>1</sub> | F <sub>2</sub> |        | $\chi^2$ (3:1) | P-Value |
|---------------------|----------------|----------------|--------|----------------|---------|
|                     |                | Wild-type      | Mutant |                |         |
| <i>tscd5</i> /WYJ7  | Normal         | 694            | 227    | 0.061          | 0.805   |
| <i>tscd5</i> /93-11 | Normal         | 1178           | 376    | 0.536          | 0.464   |

**Supplementary Table S3. Primers for fine mapping in this study.**

| Marker | Forward primer sequence (5'-3') | Reverse primer sequence (5'-3') |
|--------|---------------------------------|---------------------------------|
| B5-6   | CATTAAGCAACCTCCTAGCCA           | CAATAGAGCCTCTTGATTTAGC          |
| B5-9   | AACCACCTAGGTTTCTCCCC            | TAGCAACGAGGTTATTGGGC            |
| B5-10  | AAACAACGACGTCCCTGATC            | GTGCCTCCGTGGTTATGAAC            |
| B5-12  | ATCCCGTGTGTTGGCTTAGAATC         | TCCAAACATCAGAAAGCAAGCAC         |
| B5-13  | TTACCACAAGGATTCTCGTCG           | TCCACGGTTAAGATAAATGCATC         |
| ZL-2   | CGCCTTTATGAGGAGGAGATGG          | AAACTCTTCGACACGCCTTGC           |
| ZL-4   | GACGAAGGTGACGTAGACCG            | GACGCCTCTAGAAAGCGAG             |
| ZL-5   | CCTACGTGGCATACCATTCAGC          | GCCTCAGTCCACTGCTCACC            |
| ZL-8   | GCGCTCCGAGAATTCGTGAGG           | GACCAGCGAGTCGTCGTCATGG          |
| ZL-9   | TCAAGCTGCATTAGGAAGACACC         | AACTTAGCTGAAACGCAACACG          |
| RM440  | GGTAGGCACCAAAGAGTTTGACG         | GGCATCACCTTATCCAATCACC          |

**Supplementary Table S4. Primers for vector construction in this study.**

| Primer      | Sequence (5'→3')                           | Restriction enzyme |
|-------------|--------------------------------------------|--------------------|
| TSCD5-COM-F | ACGAATTCGAGCTCGGTACCTTAGTCCCGATTATTTCACCCG | KpnI               |
| TSCD5-COM-R | TCGACTCTAGAGGATCCTAGATCCGGTGCCACATCTATA    | BamHI              |
| TSCD5-OE-F  | TTCGAGCTCGGTACCATGGCGCTCACGACGTTCTCCA      | KpnI               |
| TSCD5-OE-R  | GCAGGTCGACTCTAGACTACGCGTTGGGCACCGTCATG     | XbaI               |
| TSCD5-GFP-F | TTACAATTACAGTCGAATGGCCTCCGACCTGCGCCCGC     | Sall               |

|             |                                        |                |
|-------------|----------------------------------------|----------------|
| TSCD5-GFP-R | TGGATCCTCTAGAGTCAGAATGATCTGAAGACGCCTTC |                |
| TSCD5-GUS-F | GCAGGCATGCAAGCTTTATTTGGACACATGCATGGAGT | <i>HindIII</i> |
| TSCD5-GUS-R | CTCAGATCTACCATGGTGCTCCTCCTCCTCAACGC    | <i>NcoI</i>    |

**Supplementary Table S5. Primers for qRT-PCR in this study.**

| Gene            | Forward primer sequence (5'-3') | Reverse primer sequence (5'-3') |
|-----------------|---------------------------------|---------------------------------|
| <i>Osh36</i>    | GCACGGAGGCGAACGA                | TTGAGCGGTAGCACCCATT             |
| <i>OsI57</i>    | ACCCTAAAGTAAATGAAGTC            | CCTGCTCTTGCTTTGTTA              |
| <i>OsI85</i>    | GAGCAACGGCGTGAGAGA              | GCGGCGGTAGAGGAGATG              |
| <i>OsWRKY23</i> | TCCAGTTCTCTCCAGTTCTAA           | CACATTGTTCTCCTTTTCTTCCC         |
| <i>OsWRKY72</i> | CACCACAAATCACATCTACTCCG         | GCTGAAGGGAAGAGAGGTGAG           |
| <i>OsNAC2</i>   | AAAAACAACCGCATTTGGCAG           | AGTCCTCATCTCCTCTGTCTAATCC       |
| <i>SGR</i>      | AGGGGTGGTACAACAAGCTG            | GCTCCTTGCGGAAGATGTAG            |
| <i>AOX1a</i>    | CTTCGCATCGGACATCCATTA           | TCCTCGGCAGTAGACAAACATC          |
| <i>AOX1b</i>    | CCTGCTCAGTTTCATCACCATCA         | GCATAAAACGGAGTGACAATAGC         |
| <i>APX1</i>     | AGGTGCCACAAGGAAAGATCTGGT        | TCAGCAGGGCTTTGTCACTAGGAA        |
| <i>APX2</i>     | TGGGAAGATGCCACAAGGAGAGAT        | TCCGCAGCATATTTCTCCACCAGT        |
| <i>CATA</i>     | CAACCGCAACGTCGACAACCTTCTT       | TTACCCGGCAGCATCAGGTAGTTT        |
| <i>CATB</i>     | GCTTGCTTTCTGCCCAGCGATAAT        | AAATAGTTTGGGCCAAGACGGTGC        |
| <i>HEMA</i>     | ATGGAGGCCCAAACAATCATC           | GCGTAGGACCTCAGCTTCTTGA          |
| <i>GSA</i>      | GCTCTCCGTGACTTGACGAAAC          | CCGAAGTATTCTTGAGCCCCA           |
| <i>HEME1</i>    | GATCCCTTGAGAACAGCAGCTG          | CATTGTAAACCTCTTCCCGCAA          |
| <i>CHLD</i>     | CGCATGCAGAATGCGAAAG             | CCTCAGCAAAATCTCCACGAAA          |
| <i>DVR</i>      | CGAGCCCAGGTTTCATCAAGGTGC        | CCTCCCGATCTTGCCGAACCTCC         |
| <i>CHLH</i>     | AACTGGATGAGCCAGAAGAGA           | AAATGCAAAAGACTTGCGACT           |
| <i>PORA</i>     | ATGGCTCTCCAAGTTCAG              | TGGCTCACGCTAAGGAAC              |
| <i>PORB</i>     | CCGCAAGGAGGGAGCGGTG             | CCCTCTTGGTGCTAAGGCCG            |
| <i>CAO1</i>     | GACACCTTCATCTGGGCTTCAA          | CGAGAGACATCCGGTAGAGC            |
| <i>NYC1</i>     | CATGCAACACCAACAAAAGG            | GACCATTCCAGGAGAAGCAG            |
| <i>NYC3</i>     | TCTATCTAGGTGCCAAAGGC            | ATTCTGGCACCTGCTGTTTC            |
| <i>RCCR1</i>    | CGCATTTCTCATGGAATTT             | CTTCTCACGCTGTTTGCCA             |
| <i>PCCR</i>     | GGATCGACGATTGATTTTCATG          | GTCGAGGCGTTCAGAAAGAT            |
| <i>PAO1</i>     | AAGCCTCCGATGTTACCGAAA           | CGAGGGTTTCCAGAATTTGA            |
| <i>HSA1</i>     | AATCAGGTGACGCCATTGTTG           | GCATGTTTCATTGCAGTATGCA          |
| <i>RpoTp</i>    | TCCTCATGTGAGCAAGGAT             | GAAAGAATGTCTGGACTTTG            |
| <i>POLP1</i>    | ACCGGTGCTTTCAGGCTTGG            | GCTGACTGATAATCACACG             |
| <i>RpoA</i>     | CGCATCAATTTGCGTCAAAG            | GTTAGCTATAGGTTGTGCCGTATCAA      |
| <i>RpoB</i>     | CAAGTTTTTCGGAGCCGAGAT           | GCTAAAGATCCAGTAAGTCCAACGT       |
| <i>RpoC1</i>    | TCCGTCGGAACAACAATCTTG           | TCCACGGCTTCTTGTACCAAT           |
| <i>RpoC2</i>    | ATGCATCGCAGGTACACCAA            | CCCTCGCGTAAATTGCTTTG            |
| <i>rps7</i>     | GCCAAAATCCATTCCAATTC            | GGAGATGTACACGAGGAGATTG          |
| <i>rps15</i>    | AGATACGGAGACTTGCTTCA            | GCTCCCTAATATCCAAGTACT           |
| <i>V1</i>       | AGAATCAGCGCGAGAAGAGAACCT        | TACACCAGCTTTGGAGGAGCTGAA        |
| <i>V2</i>       | AGCAGATCCGTGATTACATGGCGA        | TGCTCTTCACTCTCTGCAACCAA         |

|                |                           |                        |
|----------------|---------------------------|------------------------|
| <i>TCM5</i>    | TCCGCTGCGATTCTTGCT        | TCCTCTGCTCGTCCGTCAT    |
| <i>RbcL</i>    | CTTGGCAGCATTCCGAGTAA      | ACAACGGGCTCGATGTGATA   |
| <i>rbcS</i>    | TCCGCTGAGTTTTGGCTATTT     | GGACTTGAGCCCTGGAAGG    |
| <i>psaA</i>    | GCGAGCAAATAAAACACCTTTC    | GTACCAGCTTAACGTGGGGAG  |
| <i>psbA</i>    | CCCTCATTAGCAGATTCGTTTT    | ATGATTGTATTCCAGGCAGAGC |
| <i>CAB1R</i>   | AGATGGGTTTAGTGCGACGAG     | TTTGGGATCGAGGGAGTATTT  |
| <i>CAB2R</i>   | TGTTCTCCATGTTTCGGCTTCT    | GCTACGGTCCCCACTTCACT   |
| <i>LchP2</i>   | GAAGAAGATCAAGAACGGCC      | TTGCCGGGGACGAAGTTGGT   |
| <i>Lhcb1</i>   | CCATGTTCTCCATGTTTCGGCTTCT | TAGGCCCAGGCGTTGTTGTTGA |
| <i>Lhcb4</i>   | TACCTGCAGTTCGAGCTGGAC     | AGGCCGAACACCTCGGTGTA   |
| <i>TSCD5</i>   | GAAGCAAATCGGAGGGTCG       | ATGAGGTCGTCGATGTTGTG   |
| <i>Histone</i> | GGTCAACTTGTTGATTCCCCTCT   | AACCGCAAAATCCAAAGAACG  |

---
